# Supplementary material for: Stereoselective self-aggregation of synthetic zinc 31-epimeric bacteriochlorophyll-d analogs possessing a methylene group at the 132-position as models of green photosynthetic bacterial chlorosomes
Source: Royal Society of Chemistry journal article supplement (doi:10.1039/c8pp00535d), 2019-02-26
Supplement: c8pp00535d1.pdf [file c8pp00535d1.pdf]

*Supporting Information for*

**Stereoselective self-aggregation of synthetic zinc 3<sup>1</sup>-epimeric  
bacteriochlorophyll-*d* analogs possessing a methylene group  
at the 13<sup>2</sup>-position as models of green photosynthetic bacterial  
chlorosomes**

Yoshiki Fujiwara and Hitoshi Tamiaki\*

*Graduate School of Life Sciences, Ritsumeikan University, Kusatsu, Shiga 525-8577,*

*Japan. E-mail: tamiaki@fc.ritsumei.ac.jp*

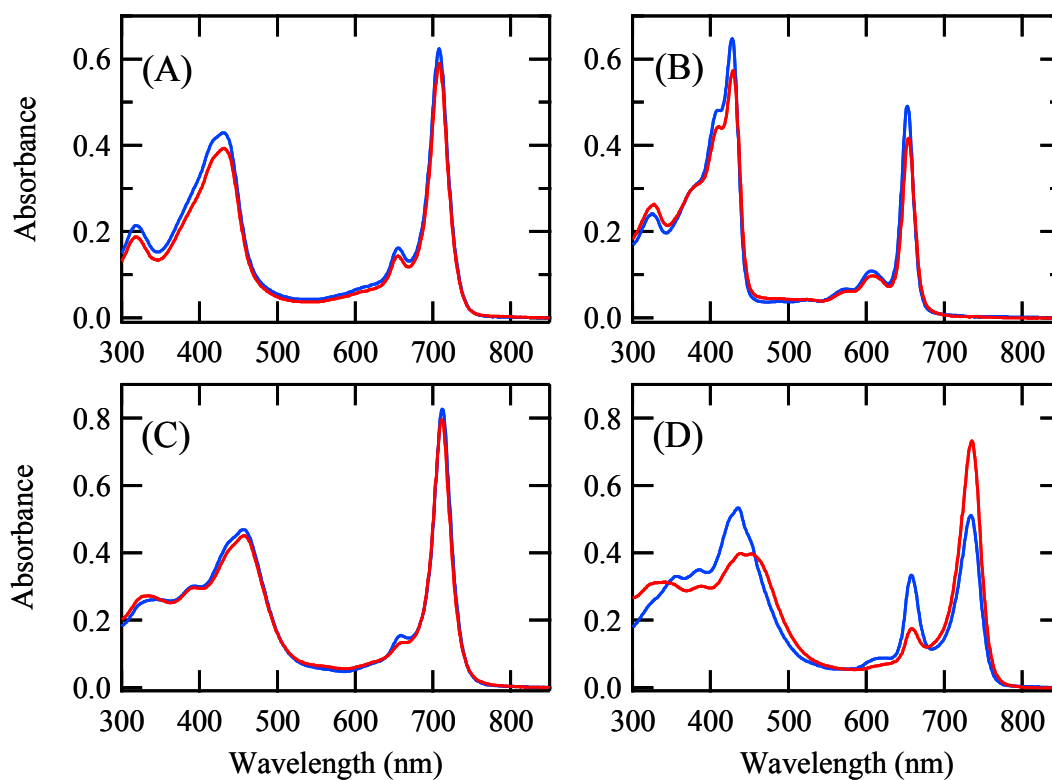

**Fig. S1** Visible absorption spectral changes of **1R** (A), **1S** (B), **2R** (C), and **2S** (D) in an aqueous 0.025%(wt/v) Triton X-100 micelle solution just after preparation (blue) and after standing for 1 day (red).

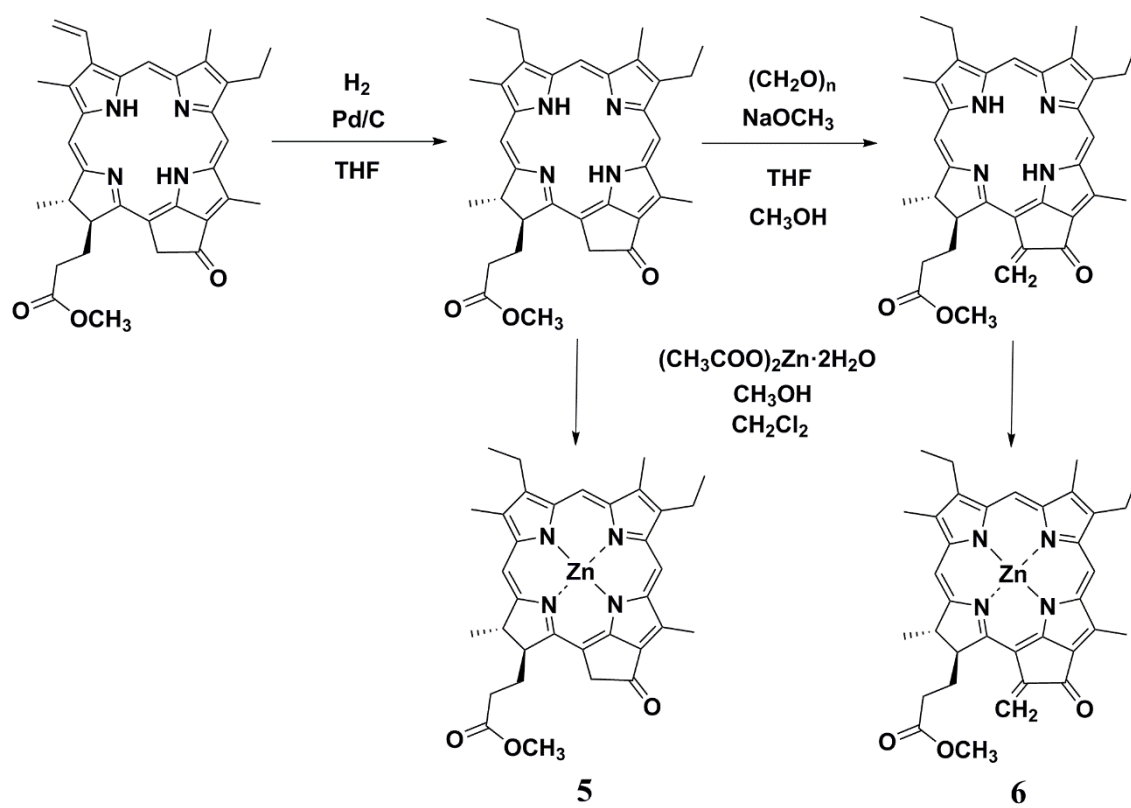

**Fig. S2** Synthesis of zinc methyl mesopyropheophorbide-*a* (**5**) and its 13<sup>2</sup>-methylenated derivative **6**.

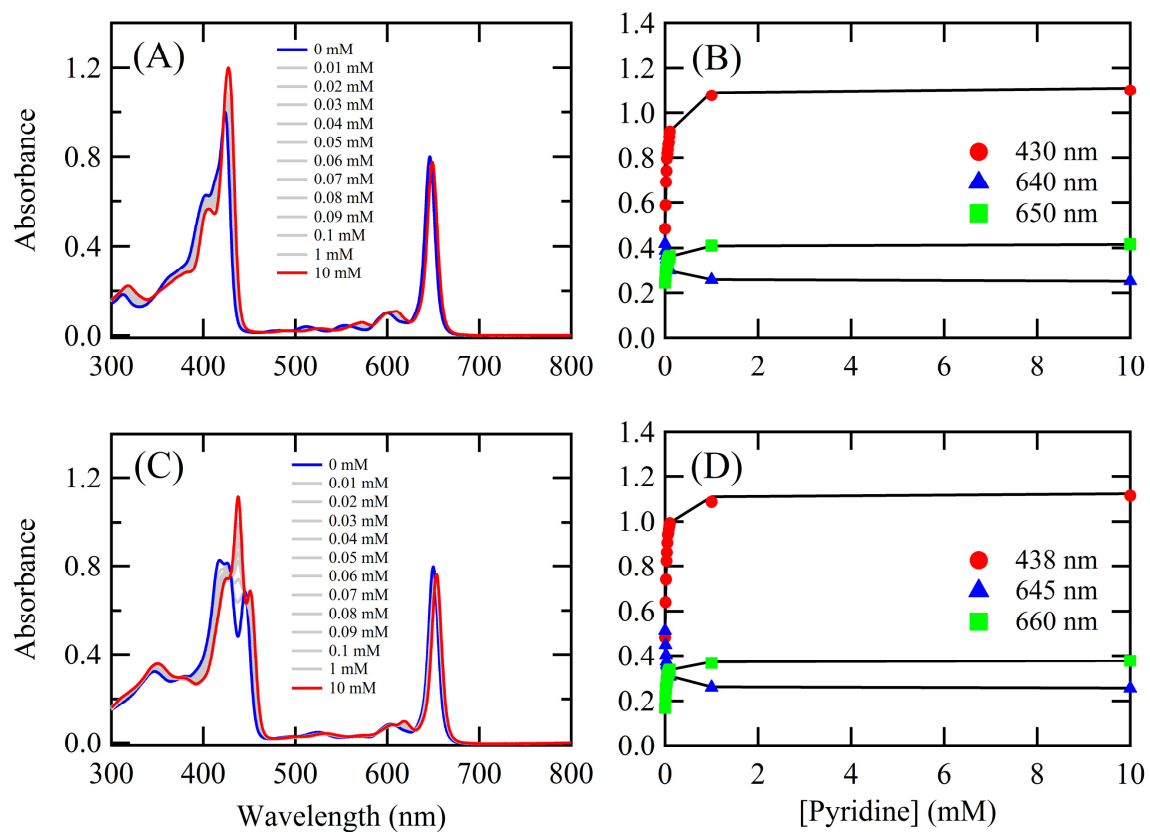

**Fig. S3** Visible absorption spectral changes of **5** (A) and **6** (C) in dry benzene (10  $\mu$ M) by addition of pyridine and their curve fitting analyses (B) and (D).

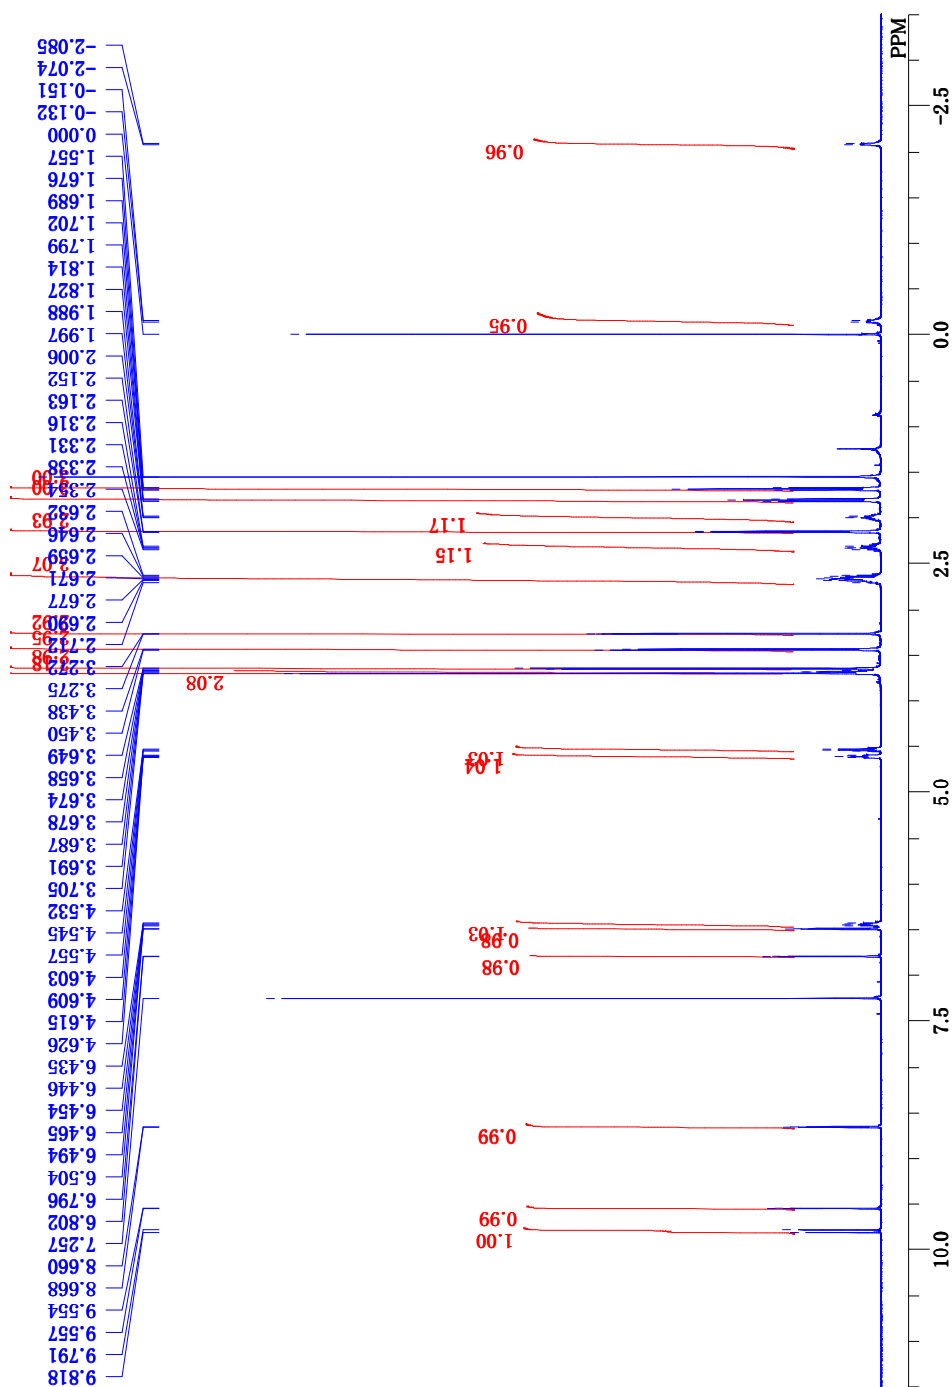

**Fig. S4** <sup>1</sup>H-NMR spectrum of methyl <sup>13</sup>C<sub>2</sub>-methylene-bacteriopheophorbide-*d* (4, 3<sup>1</sup>R:3<sup>1</sup>S = 1:1) in CDCl<sub>3</sub>.

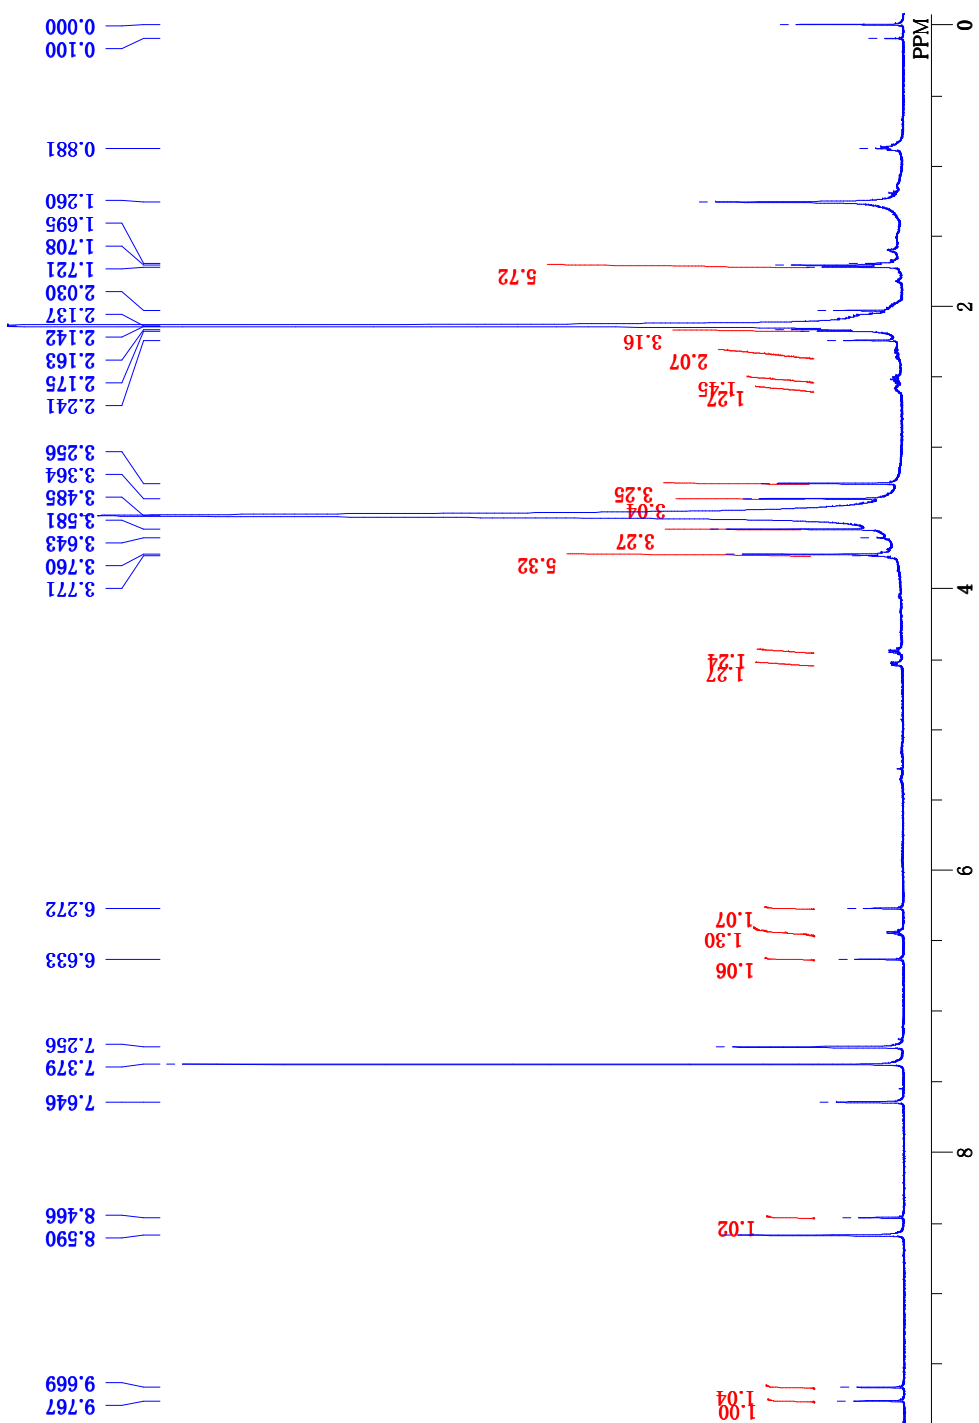

**Fig. S5** <sup>1</sup>H-NMR spectrum of zinc methyl (3<sup>1</sup>R)-13<sup>2</sup>-methylene-bacteriopheophorbide-*d* (**2R**) in CDCl<sub>3</sub>-5% pyridine-d<sub>5</sub>.

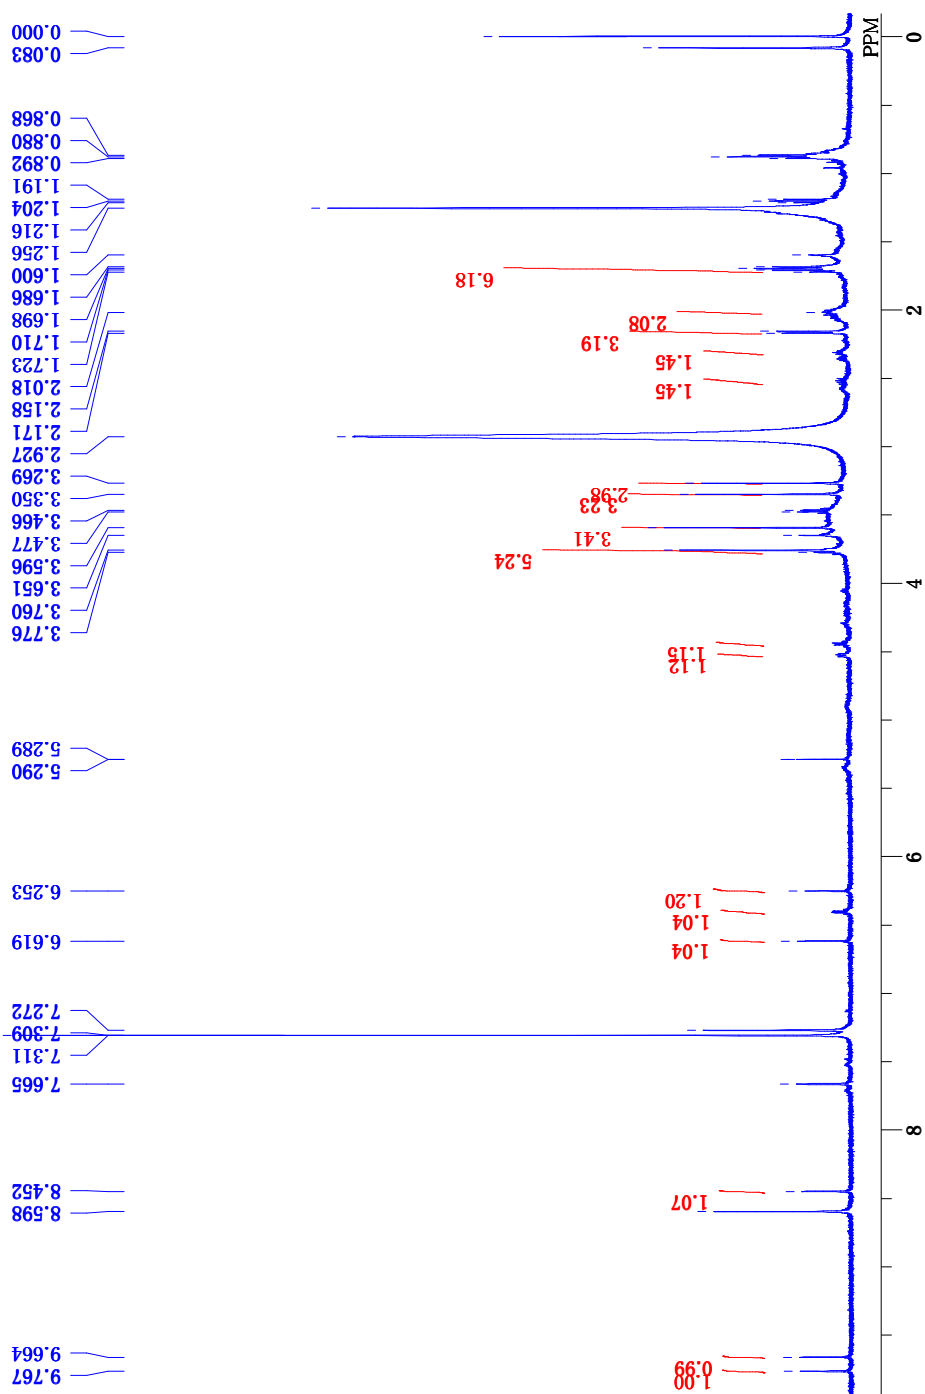

**Fig. S6**  $^1\text{H-NMR}$  spectrum of zinc methyl (3<sup>1</sup>S)-13<sup>2</sup>-methylene-bacteriopheophorbide-*d* (**2S**) in  $\text{CDCl}_3$ -5% pyridine- $d_5$ .

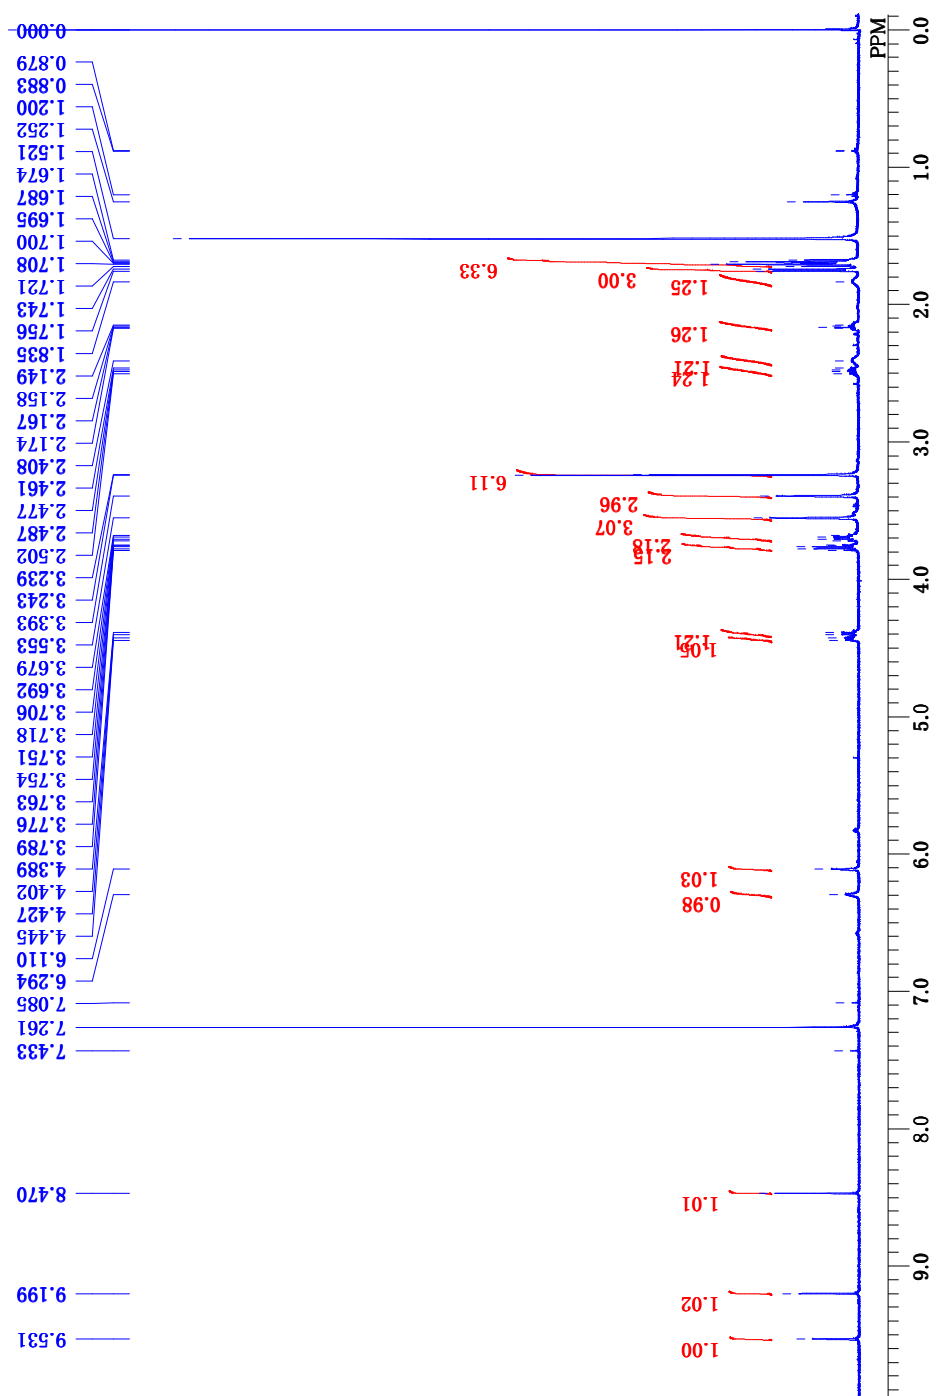

**Fig. S7**  $^1\text{H-NMR}$  spectrum of zinc methyl  $^{132}$ -methylene-mesopyropheorbide-*a* (6)

in  $\text{CDCl}_3$ .
